# Supplementary material
Source: MDPI journal article supplement (https://www.mdpi.com/2072-4292/12/23/3912)
Supplement: s1 [file s1]

## Supplementary Material

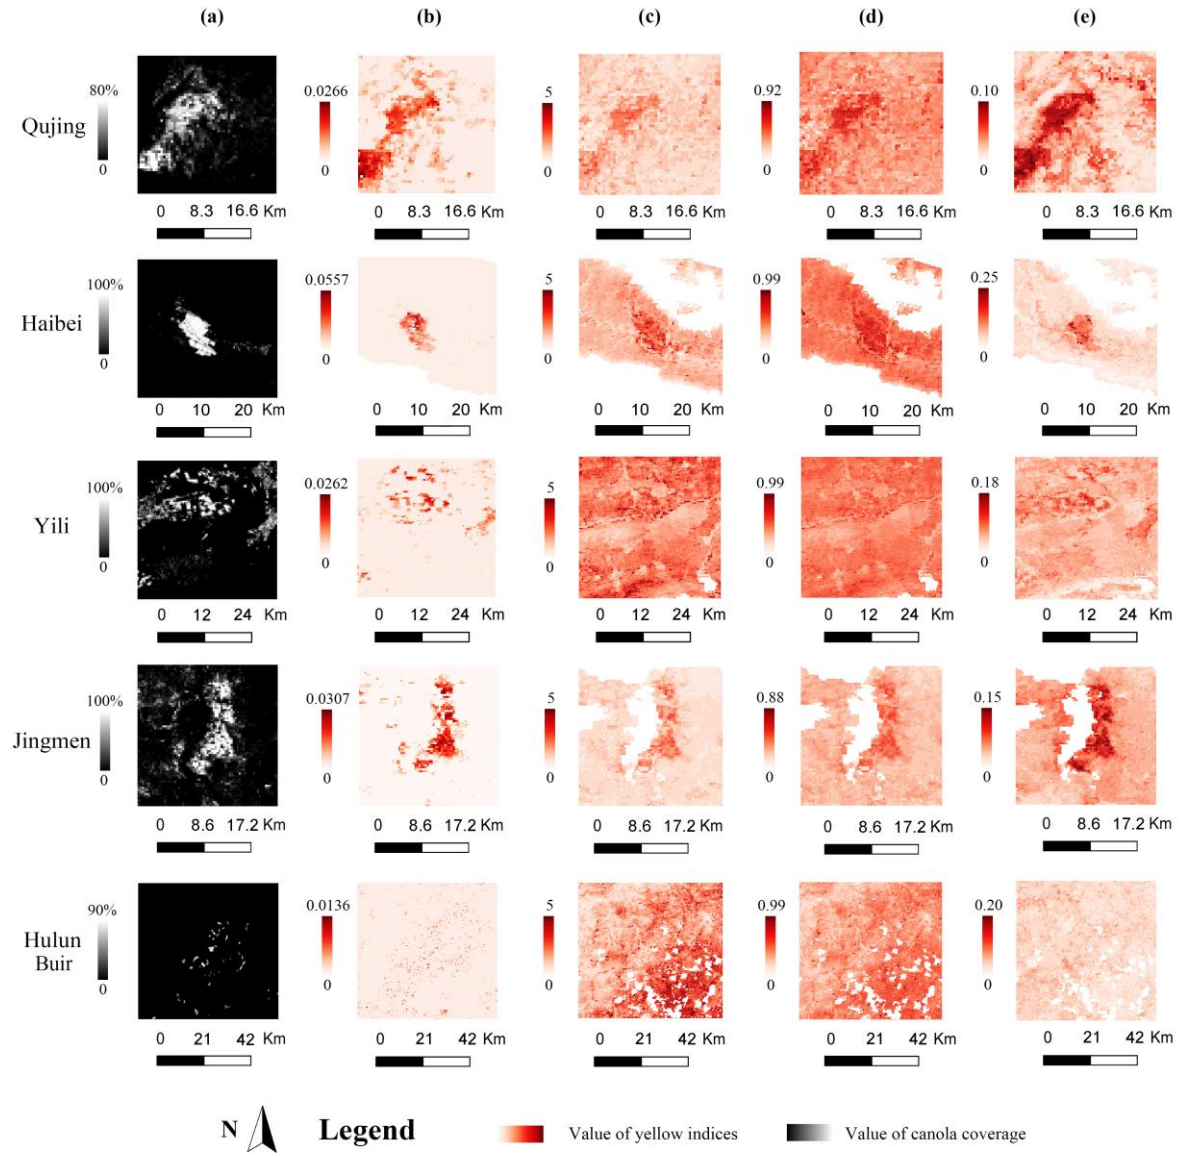

**Figure S1.** (a) Canola coverage map derived from high-resolution imagery in five subareas. Comparisons of the (b) EAYI maps, (c) RYI maps, (d) NDYI maps, (e) Ashourloo CI maps.

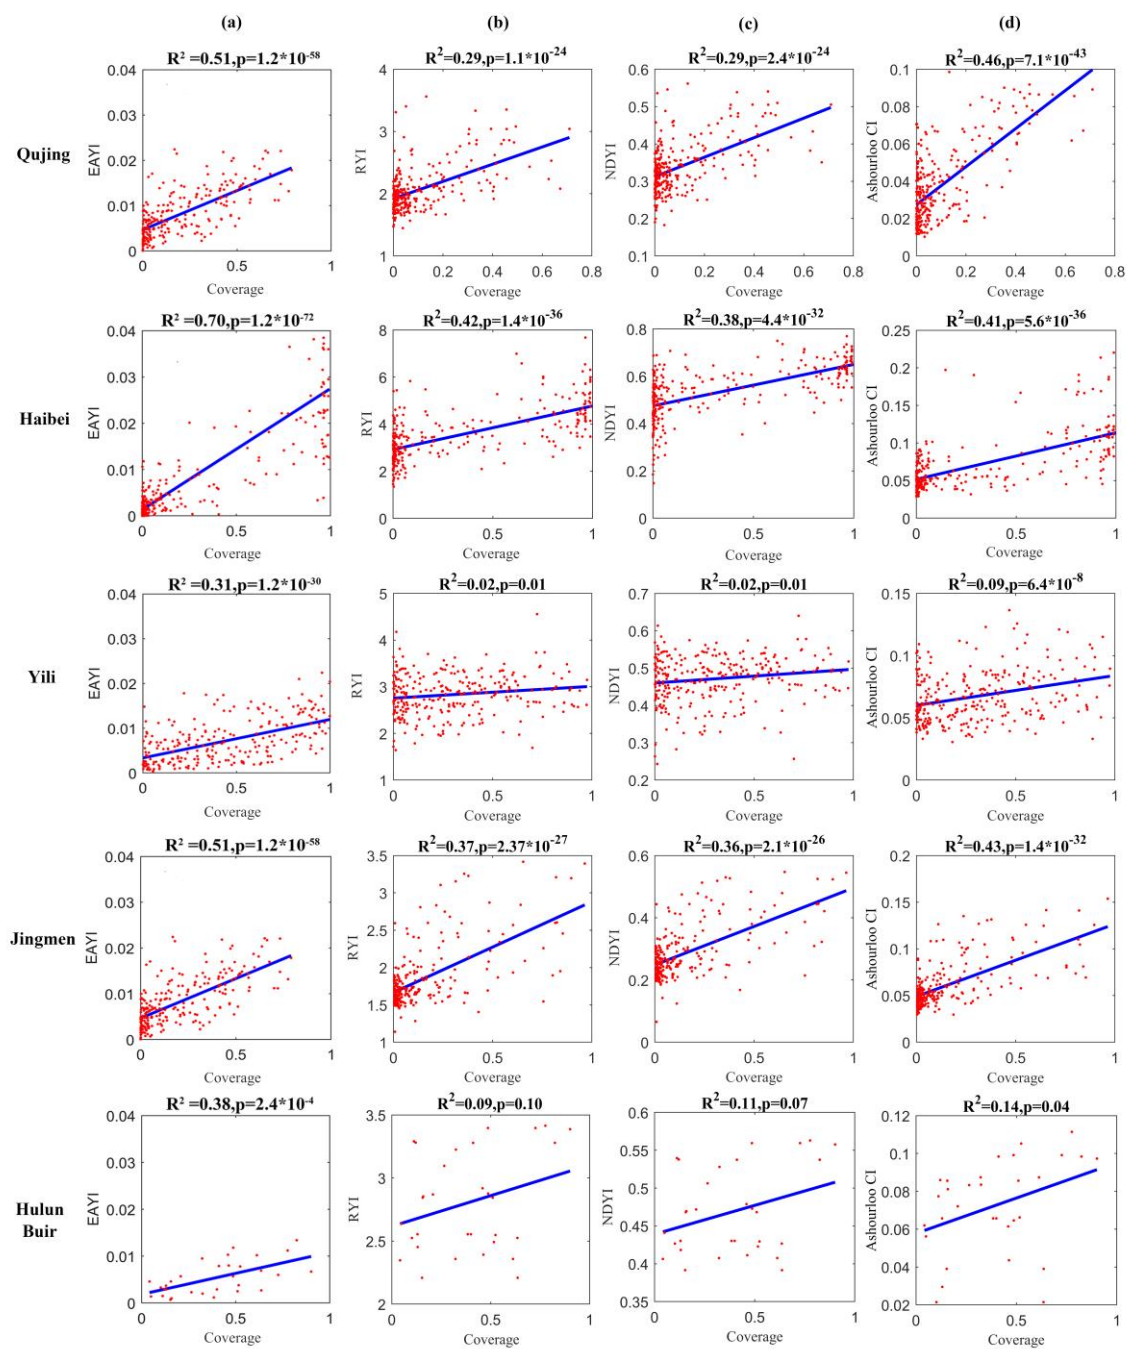

**Figure S2.** Comparisons of the relationship between four canola indices (a) EAYI, (b) RYI, (c) NDYI, (d) Ashourloo CI and coverage derived from high-resolution imagery in five subareas.

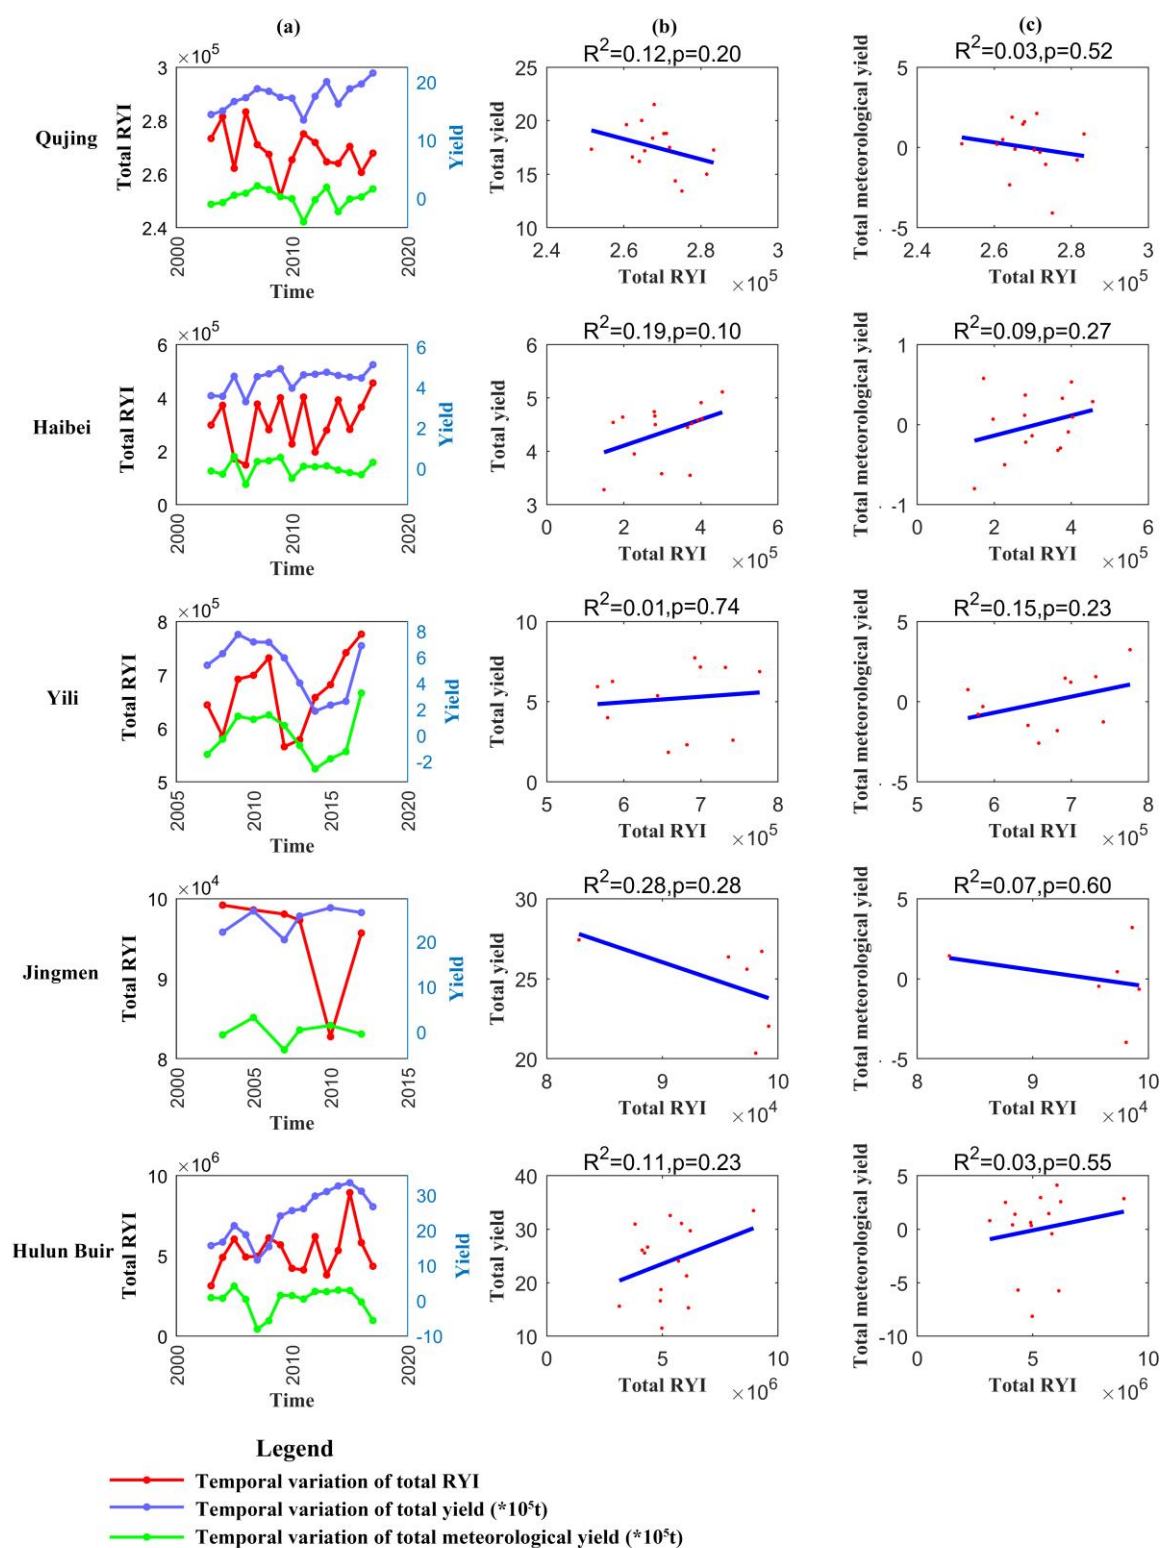

**Figure S3.** (a) The temporal variation of total RYI, total yield and total meteorological yields in five subareas; (b) The relationship between total RYI and total yield in five subareas; (c) The relationship between total RYI and meteorological yield in five subareas.

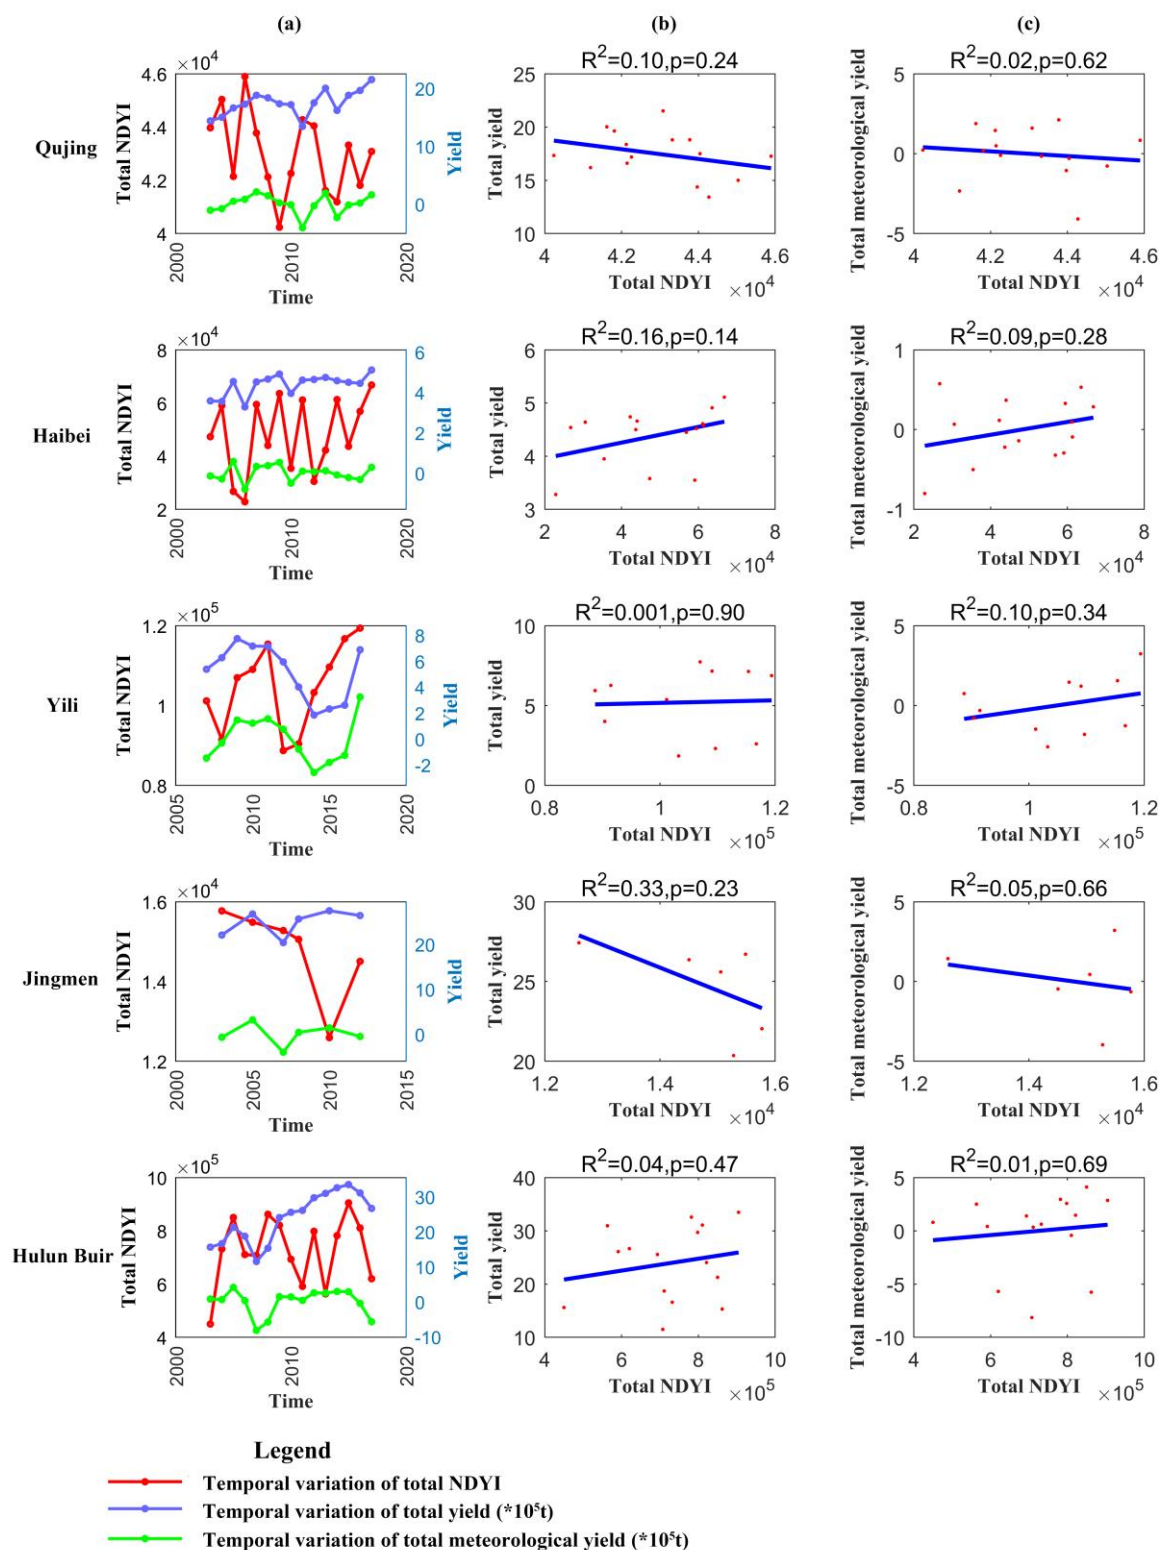

**Figure S4.** (a) The temporal variation of total NDYI, total yield and total meteorological yields in five subareas; (b) The relationship between total NDYI and total yields in five subareas; (c) The relationship of total NDYI and meteorological yield in five subareas.



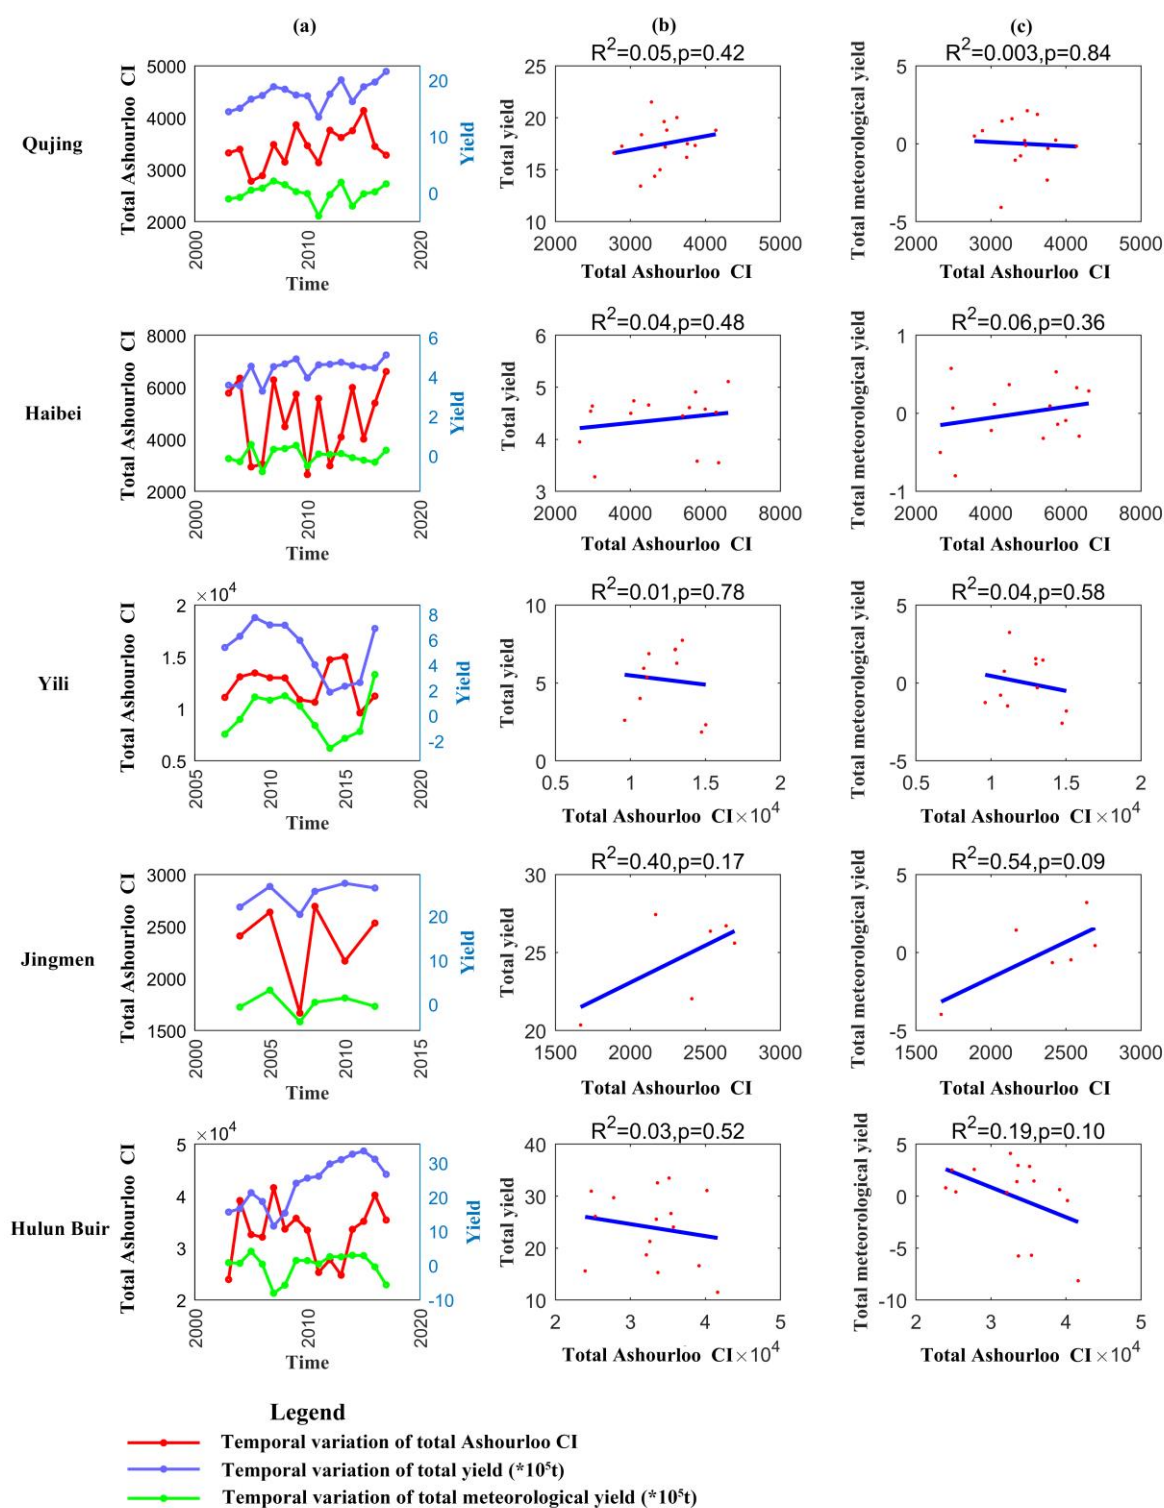

**Figure S5.** (a) The temporal variation of total Ashourloo CI, total yield and total meteorological yields in five subareas; (b) The relationship between total Ashourloo CI and total yields in five subareas; (c) The relationship of total Ashourloo CI and meteorological yield in five subareas.
